# Supplementary material for: β3-Adrenoreceptor Blockade Reduces Hypoxic Myeloid Leukemic Cells Survival and Chemoresistance
Source: PubMed Central journal article supplement (PMC7352890; doi:10.3390/ijms21124210), 2020-06-12
Supplement: ijms-21-04210-s001.pdf [file ijms-21-04210-s001.pdf]

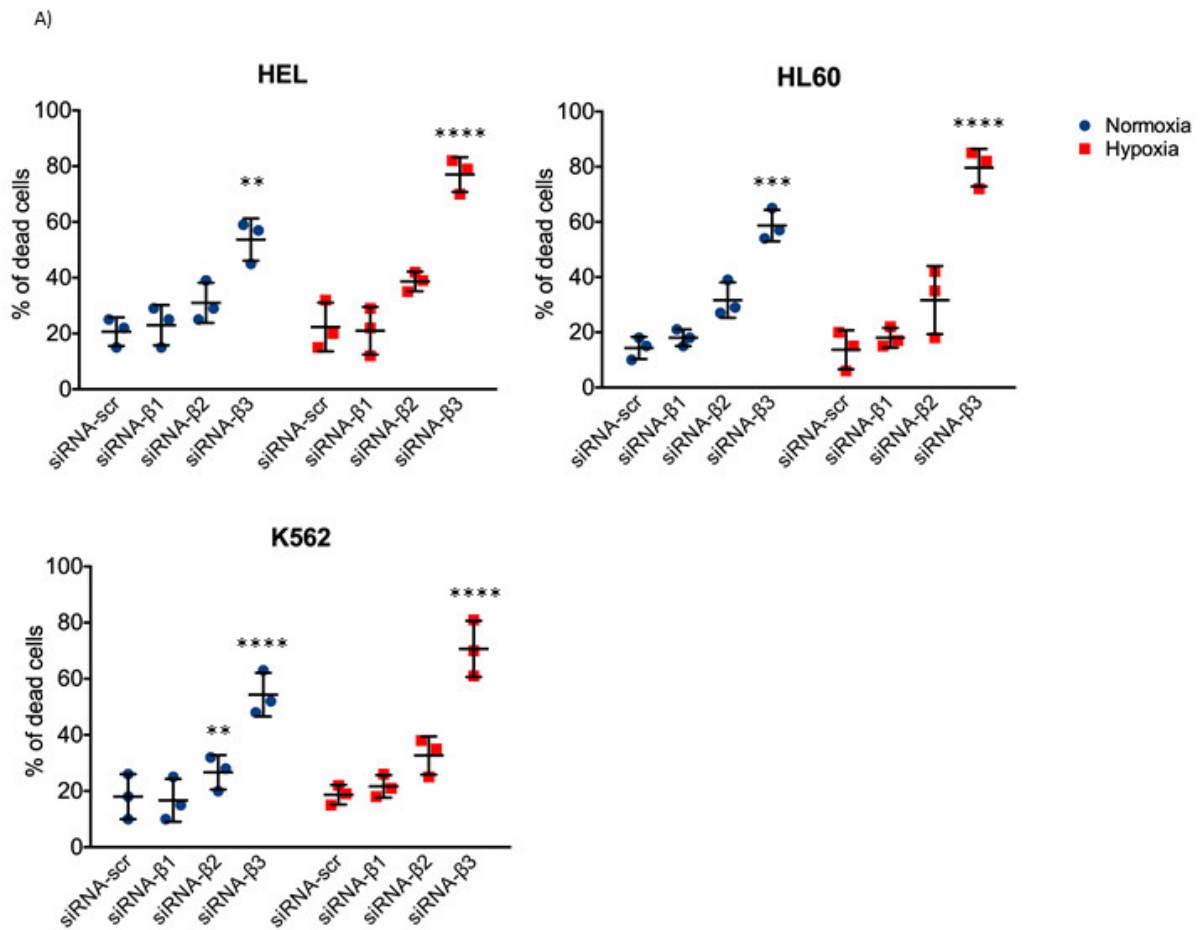

B)

|                                      | DOXO  | DOXO + SR 3 $\mu$ M | DOXO + SR 5 $\mu$ M |
|--------------------------------------|-------|---------------------|---------------------|
| IC <sub>50</sub> Normoxia ( $\mu$ M) | 0.061 | 0.089               | 0.19 (1.4)*         |
| IC <sub>50</sub> Hypoxia ( $\mu$ M)  | 0.27  | 0.04 (1.55)*        | 0.019 (14.2)*       |

**Supplementary Figure S1.** (A) Cell death assessment in myeloid leukemia cell lines silenced for  $\beta$ 1-,  $\beta$ 2- and  $\beta$ 3-ARs in hypoxia and normoxia. Apoptosis evaluation through Annexin V and Propidium Iodide in HEL, K562, and HL60 cell lines transfected with selective siRNA for  $\beta$ 1-,  $\beta$ 2-,  $\beta$ 3-ARs. (B) Average IC<sub>50</sub> values of doxorubicin and its combination with the SR59230A (referring to Figure 6B). The table also shows the RF (\*reversal fold) value calculated from the ratio between the IC<sub>50</sub> value of doxorubicin in the absence of SR59230A and in the combination with the compound under study.

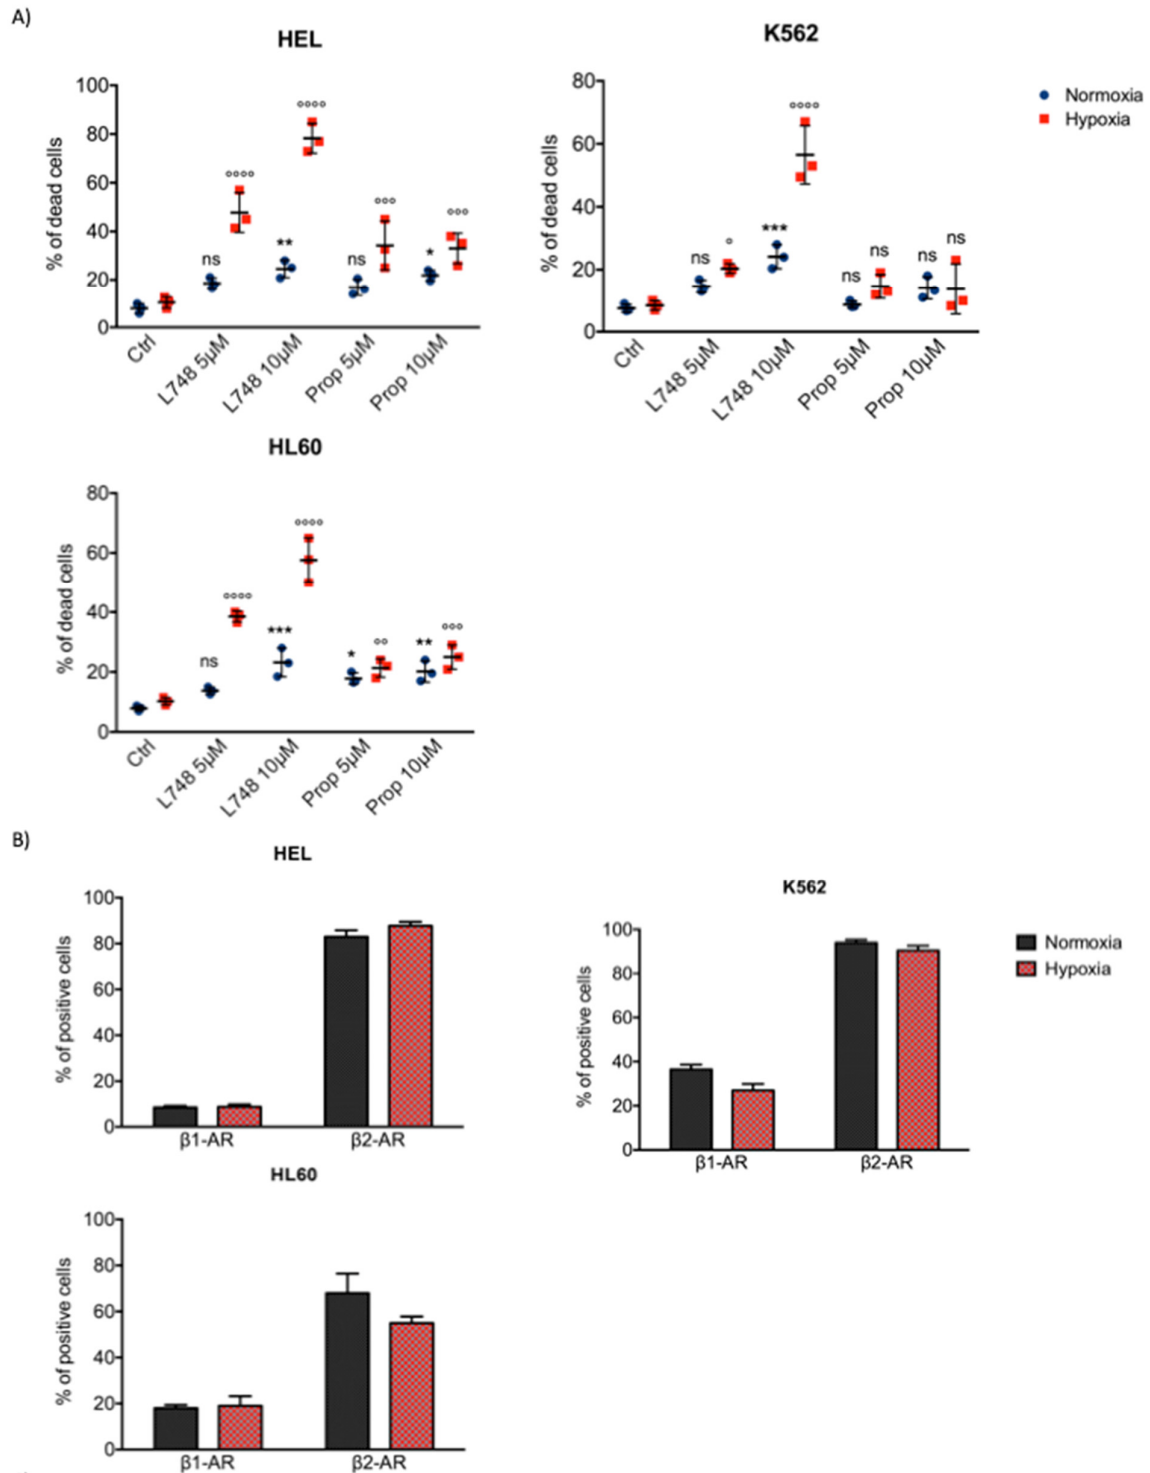

**Supplementary Figure S2. (A)** Cell death assessment in myeloid leukemia cell lines treated with L748,337 and Propranolol in hypoxia and normoxia.  $\beta$ -ARs blockers effects on HEL, K562 and HL60 leukemia cell lines. Apoptosis evaluation through Annexin V in HEL, K562 and HL60 cell lines treated with different concentration of L748,337 (5  $\mu$ M, 10  $\mu$ M) and Propranolol (5  $\mu$ M, 10  $\mu$ M) for 48 h, in normoxia (21% O<sub>2</sub>) and in hypoxia (1% O<sub>2</sub>); Significance was calculated by one-way ANOVA analysis followed by Bonferroni's post-hoc test. Results are reported as mean  $\pm$  SD of three independent experiments. n = 3 per group. (\*P < 0.05, \*\*P < 0.01, \*\*\*P < 0.001 L748 or Prop vs. Ctrl Normoxia; °P < 0.05, °°P < 0.01, °°°P < 0.001, °°°°P < 0.0001 L748 or Prop vs. Ctrl Hypoxia). **(B)**  $\beta$ 1-  $\beta$ 2- and  $\beta$ 3-ARs protein expression in myeloid leukemia cell lines in hypoxia and

normoxia. Evaluation of  $\beta$ 1-AR and  $\beta$ 2-AR positive cells in HEL, K562 and HL60 leukemia cell lines in normoxia and hypoxia.
